# Supplementary material for: The synthesis and characterization of lead sulfide with cube-like structure as a counter electrode in the presence of urea using a hydrothermal method
Source: Royal Society of Chemistry journal article supplement (doi:10.1039/c5nj01308a), 2015-01-01
Supplement: c5nj01308a1.pdf [file c5nj01308a1.pdf]

## Synthesis and characterization of cube like structured lead sulfide as a counter electrode in the presence of urea using hydrothermal method

Sunkara Srinivasa Rao, Ikkurthi Kanaka Durga, Chebrolu Venkata Tulasi-Varma,

Dinah Punnoose, Lee Jae Cheol, and Hee-Je Kim \*

School of Electrical Engineering, Pusan National University, San 30, Jangjeong-Dong,  
Gumjeong-Ku, Busan-609 735, South Korea.

\*Corresponding Author. Tel: +82 51 510 2364. Fax: +82 51 513 0212. E-mail:

[heeje@pusan.ac.kr](mailto:heeje@pusan.ac.kr) (H.-J. Kim).

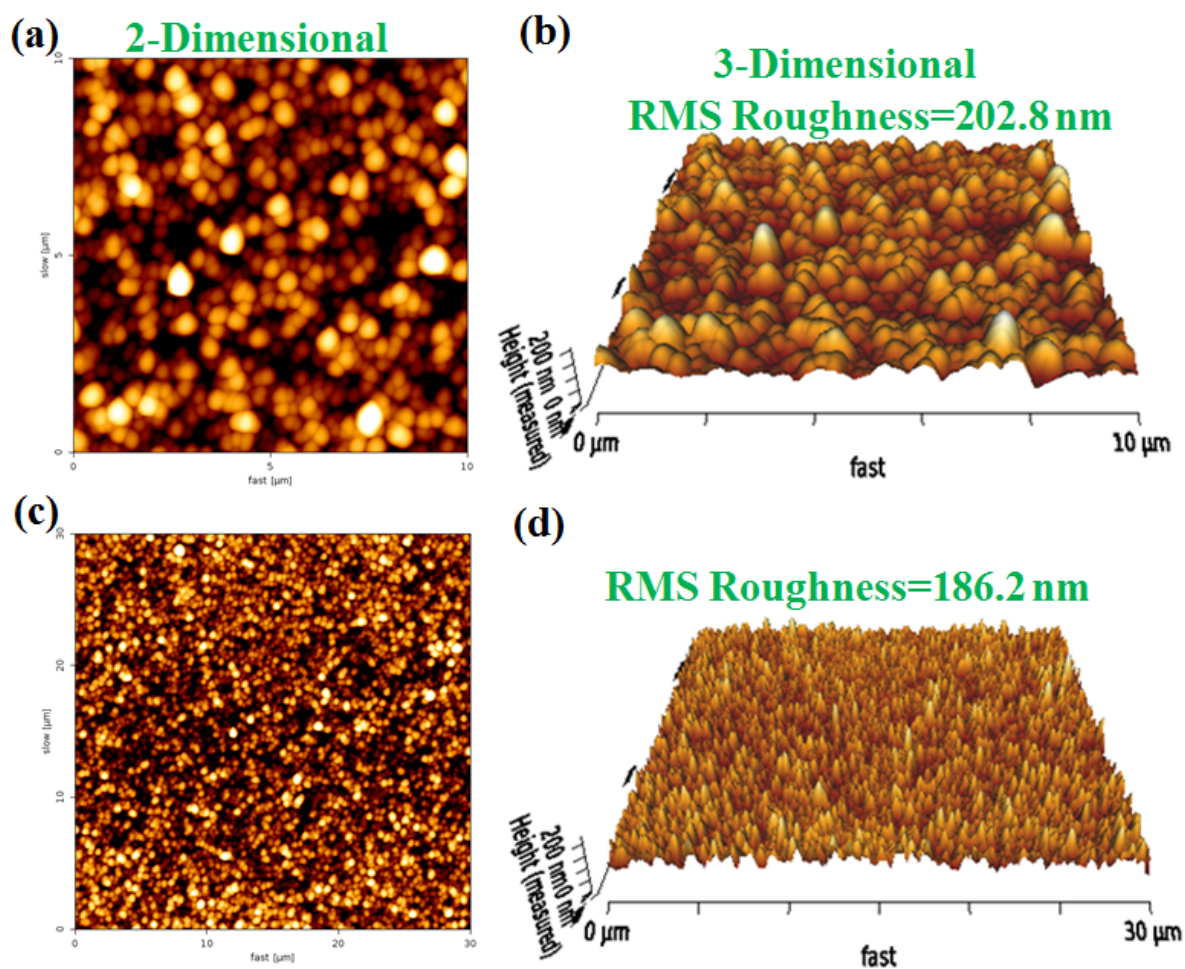

Fig. S1 AFM images of the PbS (0.6 M urea, Fig. a and b), and 0.9 M urea (Figure (c) and (d))

electrodes. The left one corresponds to 2D and the right ones correspond to 3D images.

The root mean square (RMS) surface roughness of the 0.6 M urea and 0.9 M urea are 202.8 and 186.2 nm, which is lower than that of the 0.3 M urea (269.8 nm) and 0 M urea (217.8 nm). The AFM results clearly support that the greater surface roughness or surface area of the CE is responsible for the greater electrocatalytic activity for the reduction.

### **Calculation of fill factor (FF) and power conversion efficiency (PCE)**

The FF of a QDSSCs can be calculated as follows:

$$FF = I_{mp} V_{mp} / I_{sc} V_{oc} \quad (1)$$

Where  $I_{mp}$  and  $V_{mp}$  are the maximum current and voltage, and  $I_{sc}$ ,  $V_{oc}$  are the short-circuit current and open-circuit voltage.

The PCE of a QDSSCs is determined as the fraction of incident power which is converted to electricity and can be calculated as follows:

$$PCE = V_{oc} I_{sc} FF / P_{in} \quad (2)$$

Where  $P_{in}$  is the power of incident light on the cell. The detailed calculation of FF and PCE was reported in the previous reports.<sup>1</sup>

### **References**

1 O. O. Kelvin and Ekpunobi, *Advances in Applied Science Research*, 2013, **3(5)**, 3390.
